# Supplementary material for: Mitochondria-targeted ratiometric fluorescent imaging of cysteine
Source: Royal Society of Chemistry journal article supplement (doi:10.1039/d1an00758k), 2021-01-01
Supplement: d1an00758k1.pdf [file d1an00758k1.pdf]

## **Supplemental Information for**

# **Mitochondria-Targeted Ratiometric Fluorescent Imaging of Cysteine**

Ya-Nan Wei, Bo Lin, Yang Shu\*, Jian-Hua Wang\*

Department of Chemistry, College of Sciences, Northeastern University, Shenyang  
110819, China

## Table of contents

|                                                                                           |           |
|-------------------------------------------------------------------------------------------|-----------|
| <b>Experimental Section</b> .....                                                         | <b>3</b>  |
| Synthesis of <b>Compound 1</b> .....                                                      | 3         |
| Synthesis of Compound <b>NET-OH</b> .....                                                 | 3         |
| Synthesis of Compound <b>ANET</b> .....                                                   | 3         |
| <b>Supplementary Figures</b> .....                                                        | <b>4</b>  |
| <b>Scheme S1.</b> Reaction mechanism .....                                                | 4         |
| <b>Table S1.</b> Cys fluorescent probes .....                                             | 5         |
| <b>Figure S1.</b> Time-dependent UV spectrum.....                                         | 6         |
| <b>Figure S2.</b> Excitation and emission spectra.....                                    | 7         |
| <b>Figure S3.</b> Fluorescence spectra for biotriols selectivity .....                    | 8         |
| <b>Figure S4.</b> Selectivity in various analytes .....                                   | 9         |
| <b>Figure S5.</b> ESI-MS spectrum of <b>1</b> in positive ion mode .....                  | 10        |
| <b>Figure S6.</b> ESI-MS spectrum of <b>NET-OH</b> in positive ion mode.....              | 11        |
| <b>Figure S7.</b> ESI-MS spectrum of <b>ANET</b> in positive ion mode .....               | 12        |
| <b>Figure S8.</b> <sup>1</sup> H NMR spectrum of <b>Compound 1</b> .....                  | 13        |
| <b>Figure S9.</b> <sup>13</sup> C NMR spectrum of <b>Compound 1</b> .....                 | 14        |
| <b>Figure S10.</b> <sup>1</sup> H NMR spectrum of <b>NET-OH</b> .....                     | 15        |
| <b>Figure S11.</b> <sup>13</sup> C NMR spectrum of <b>NET-OH</b> .....                    | 16        |
| <b>Figure S12.</b> <sup>1</sup> H NMR spectrum of <b>ANET</b> .....                       | 17        |
| <b>Figure S13.</b> <sup>13</sup> C NMR spectrum of <b>ANET</b> .....                      | 18        |
| <b>Figure S14.</b> Energy-optimized geometries of <b>ANET</b> and <b>NET-OH</b> .....     | 19        |
| <b>Figure S15.</b> ESI-MS spectrum of <b>ANET</b> +Cys in positive ion mode for 0 h ..... | 20        |
| <b>Figure S16.</b> ESI-MS spectrum of <b>ANET</b> +Cys in negative ion mode for 0 h ..... | 21        |
| <b>Figure S17.</b> ESI-MS spectrum after reaction for 12 h in positive ion mode.....      | 22        |
| <b>Figure S18.</b> ESI-MS spectrum after reaction for 12 h in negative ion mode .....     | 23        |
| <b>Figure S19.</b> The cell cytotoxicity in HepG2 cells .....                             | 24        |
| <b>Figure S20.</b> The cell cytotoxicity in Hela cells .....                              | 25        |
| <b>Reference</b> .....                                                                    | <b>26</b> |

## Experimental Section:

### Synthesis of Compound 1

2-Methylbenzothiazole (3.18 mL, 25 mmol) and Iodoethane (10.5 mL, 125 mmol) were added in thick glass tube, and the mixture was stirred at 140°C for 12 h. After cooled to room temperature, the reaction extracted with water and ethyl acetate, and the water phase was dried by rotary evaporator to obtain Compound 1 (5.49 g, 72% yield). HRMS: Calculated for C<sub>10</sub>H<sub>12</sub>NS<sup>+</sup> 178.0685; Found: 178.0732 (Figure S4).

### Synthesis of Compound NET-OH

Compound 1 (304.9 mg, 1.0 mmol), 6-Hydroxy-2-naphthaldehyde (258.3 mg, 1.5 mmol) and 400 μL Piperidine were dissolved in 100 mL EtOH, and the mixture was stirred at 105°C for 24 h. After the reaction was completed, the mixture was cooled to room temperature and the solvent was removed under reduced pressure. The crude product was extracted with water and ethyl acetate, and the product was in the water layer. The water was removed by rotary evaporator to obtain NET-OH (280.4 mg, 63% yield). HRMS: Calculated for C<sub>21</sub>H<sub>18</sub>NOS<sup>+</sup> 332.1104; Found: 332.1285 (Figure S5).

### Synthesis of Compound ANET

NET-OH (91.8 mg, 0.2 mmol), Acryloyl chloride (200 μL, 2.45 mmol) and Na<sub>2</sub>CO<sub>3</sub> (150.0 mg, 1.42 mmol) were added in 20 mL ACN, and the mixture was stirred at room temperature for 48 h. After filtered the mixture, the obtained solution was dried by rotary evaporator, purified by column chromatography on silica gel by using (CH<sub>2</sub>Cl<sub>2</sub>: CH<sub>3</sub>OH=20: 1) to obtain ANET (52.3 mg, 51% yield).<sup>1-3</sup> HRMS: Calculated for C<sub>24</sub>H<sub>20</sub>NO<sub>2</sub>S<sup>+</sup> 386.1209; Found: 386.1443 (Figure S6).

## Supplementary Figures:

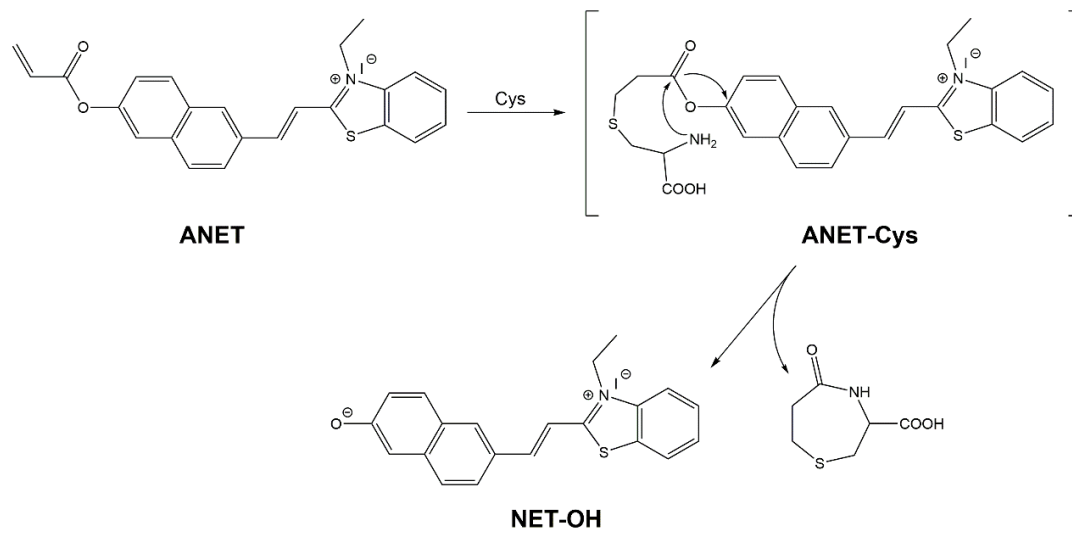

**Scheme S1.** The reaction mechanism of **ANET** with Cys.

**Table S1.** Comparison of ANET with other representative Cys fluorescent probes.

| Structures                                                                                        | Responsive group                                                                    | Targeting ability | Selectivity | DL ( $\mu\text{M}$ )     | Ratio | Stokes shift          | Reference |
|---------------------------------------------------------------------------------------------------|-------------------------------------------------------------------------------------|-------------------|-------------|--------------------------|-------|-----------------------|-----------|
| 1 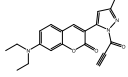               |    | No                | Cys/Hcy     | Cys: 0.049<br>Hcy: 0.051 | No    | 65                    | 43        |
| 2                |    | No                | Cys/Hcy     | Not mentioned            | No    | 125/127               | 44        |
| 3                | $\text{R}-\text{CHO}$                                                               | Mito              | Cys/Hcy     | Not mentioned            | Yes   | 157 $\rightarrow$ 140 | 45        |
| 4                |    | Mito              | Cys/Hcy     | Cys: 0.022<br>Hcy: 0.023 | Yes   | 85 $\rightarrow$ 40   | 46        |
| 5                |    | No                | Cys         | 0.16                     | No    | 103                   | 47        |
| 6               |  | No                | Cys         | 0.12                     | No    | 45                    | 28        |
| 7              |  | No                | Cys         | 0.102                    | No    | 302                   | 38        |
| 8              |  | No                | Cys         | 0.243                    | No    | 50                    | 48        |
| 9              |  | No                | Cys         | 16.7                     | No    | 145                   | 49        |
| 10             |  | No                | Cys         | 0.087                    | No    | 161                   | 50        |
| 11             |  | No                | Cys         | 0.0018                   | Yes   | 95 $\rightarrow$ 70   | 51        |
| 12             |  | Yes               | Cys         | 0.021                    | No    | 260                   | 52        |
| 13. This work  |  | Yes               | Cys         | 0.074                    | Yes   | 119 $\rightarrow$ 163 |           |

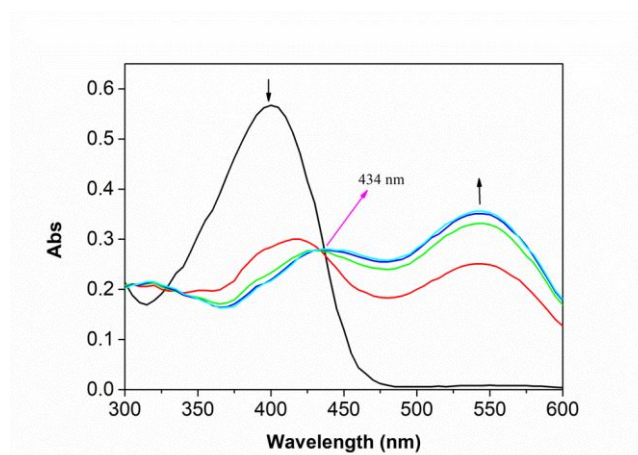

**Figure S1.** The time-dependent UV spectrum of ANET (50 μM)+Cys (50 μM) in DMSO: PBS buffer (1/1 v/v) at pH 7.4.

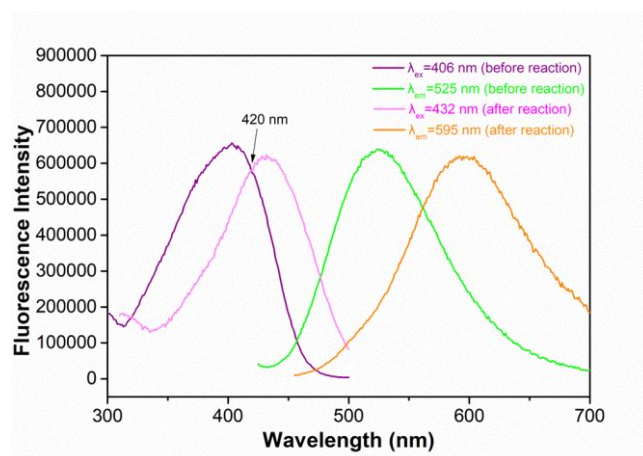

**Figure S2.** The excitation and emission spectra of ANET (10 μM) before and after reaction with Cys (10 μM) in DMSO: PBS buffer (1/1 v/v) at pH 7.4.

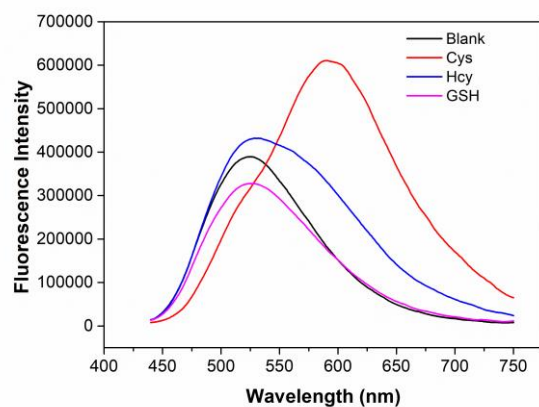

**Figure S3.** Fluorescence spectra of ANET (10  $\mu$ M) upon addition of 10  $\mu$ M Cys, 10  $\mu$ M Hcy, 1mM GSH after 10 min respectively.



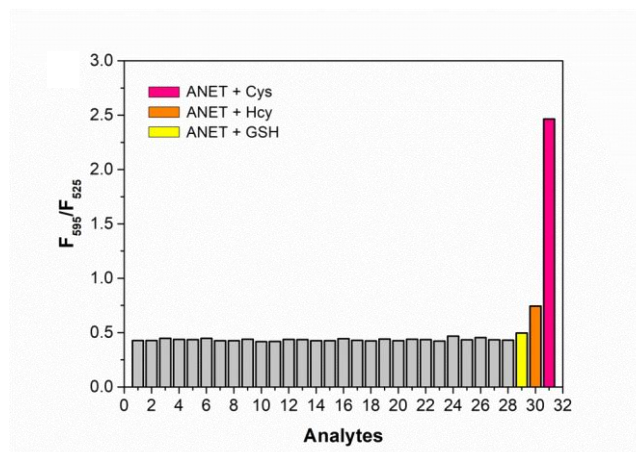

**Figure S4.** Fluorescence intensity at  $F_{595}/F_{525}$  of ANET (10  $\mu\text{M}$ ) in the presence of various analytes for 10 min: (1) Blank, (2)  $\text{Cl}^-$ , (3)  $\text{Br}^-$ , (4)  $\text{CO}_3^{2-}$ , (5)  $\text{SO}_4^{2-}$ , (6)  $\text{S}^{2-}$ , (7)  $\text{NO}_3^-$ , (8)  $\text{NO}_2^-$ , (9)  $\text{K}^+$  (140 mM), (10)  $\text{Mg}^{2+}$ , (11)  $\text{Zn}^{2+}$ , (12)  $\text{Fe}^{2+}$ , (13) Ala, (14) Arg, (15) Asp, (16) Glu, (17) Gly, (18) His, (19) Leu, (20) Lys, (21) Ile, (22) Met, (23) Phe, (24) Pro, (25) Ser, (26) Thr, (27) Try, (28) Val, (29) GSH (1 mM), (30) Hcy (10  $\mu\text{M}$ ), (31) Cys (10  $\mu\text{M}$ ), the concentration of other analytes is 100  $\mu\text{M}$

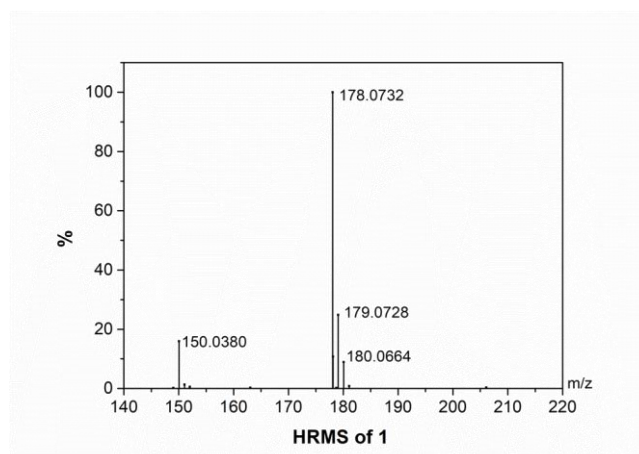

**Figure S5.** ESI-MS spectrum of **1** in positive ion mode.

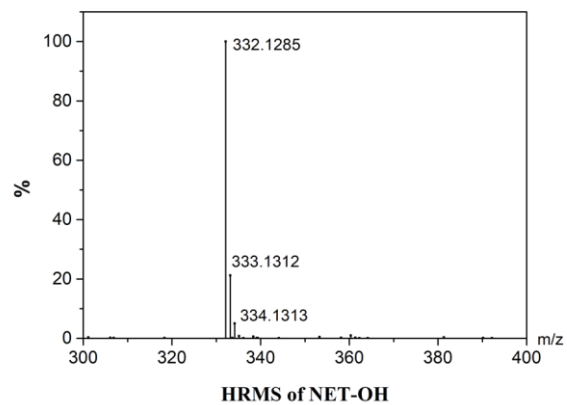

**Figure S6.** ESI-MS spectrum of **NET-OH** in positive ion mode.

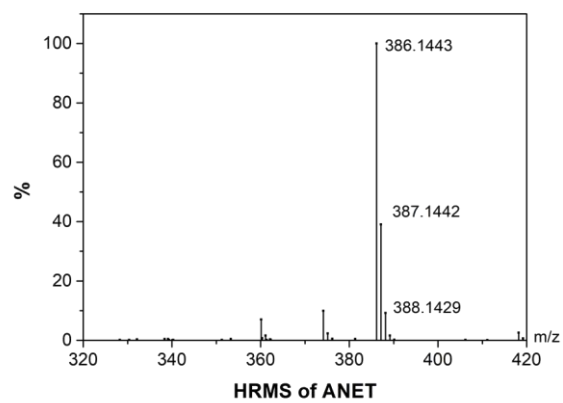

**Figure S7.** ESI-MS spectrum of **ANET** in positive ion mode.

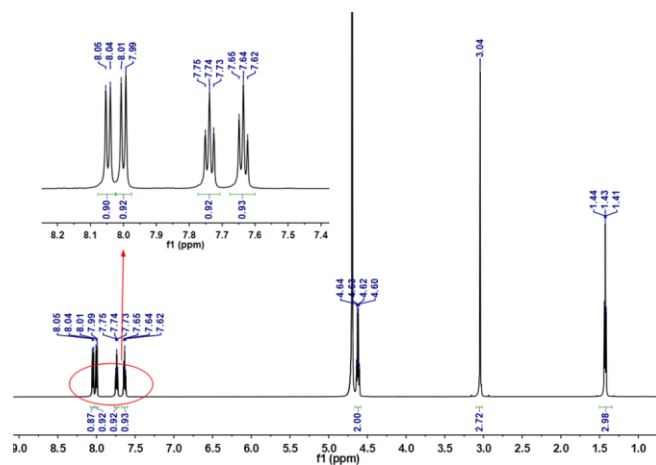

**Figure S8.** <sup>1</sup>H NMR spectrum of **Compound 1** in D<sub>2</sub>O.

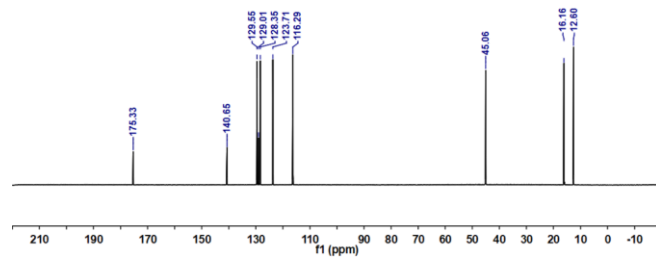

**Figure S9.**  $^{13}\text{C}$  NMR spectrum of **Compound 1** in  $\text{D}_2\text{O}$

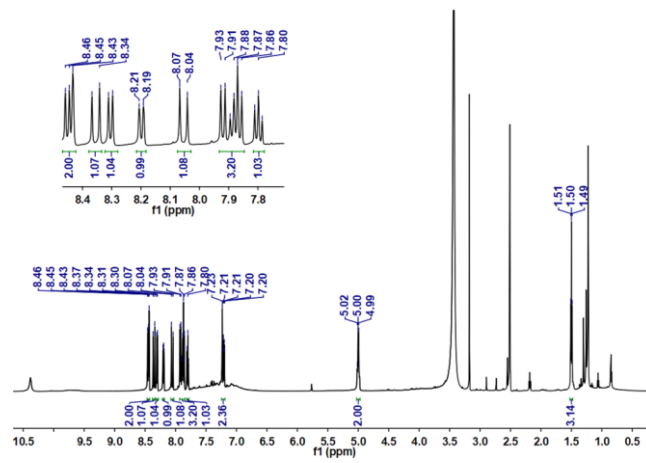

**Figure S10.** <sup>1</sup>H NMR spectrum of NET-OH in DMSO-d<sub>6</sub>.

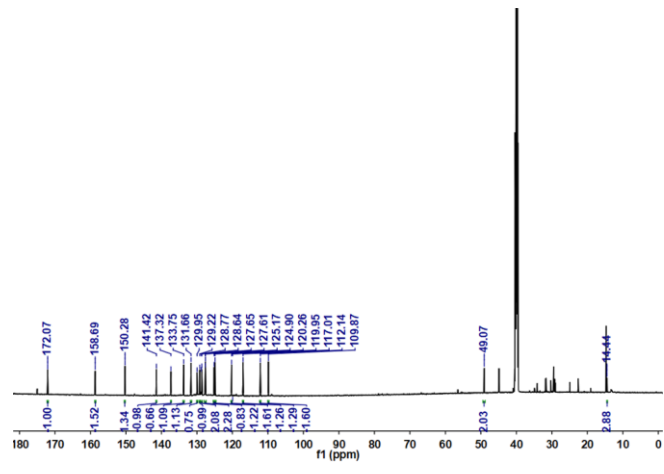

**Figure S11.** <sup>13</sup>C NMR spectrum of NET-OH in DMSO-*d*<sub>6</sub>.



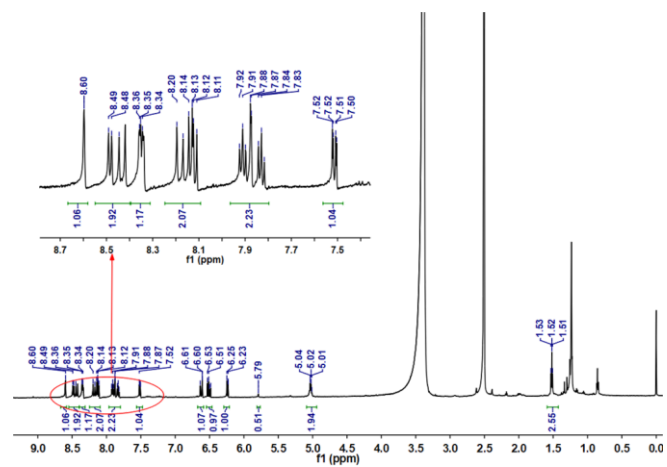

**Figure S12.**  $^1\text{H}$  NMR spectrum of ANET in  $\text{DMSO-}d_6$ .

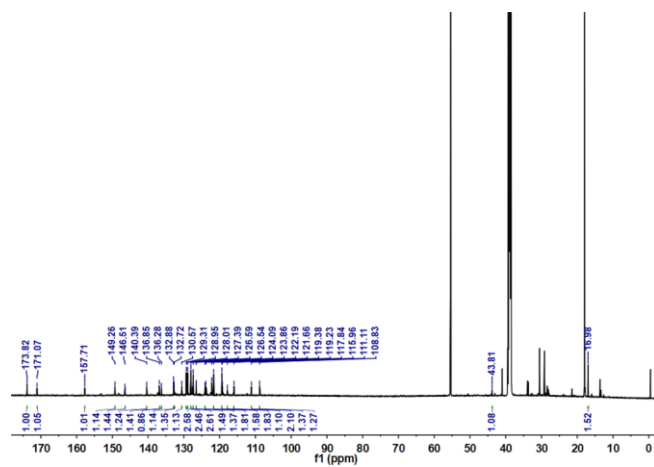

**Figure S13.**  $^{13}\text{C}$  NMR spectrum of ANET in  $\text{DMSO-}d_6$ .

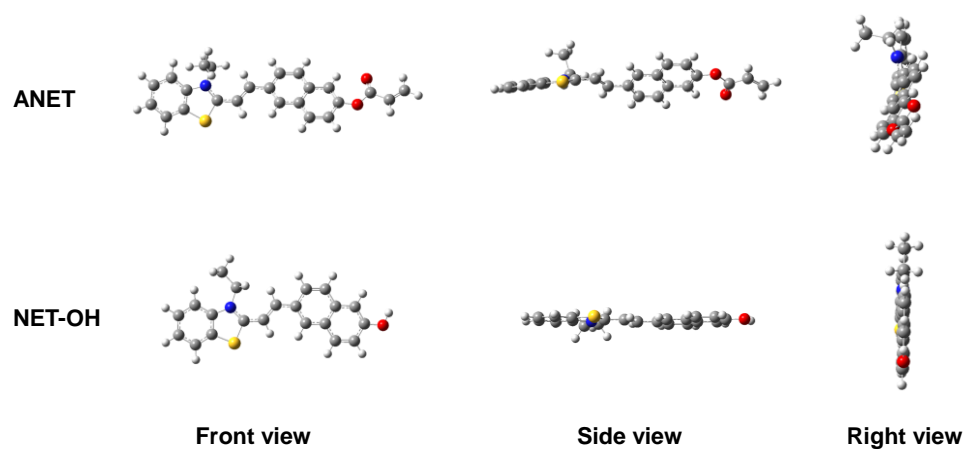

**Figure S14.** Energy-optimized geometries of ANET and NET-OH.

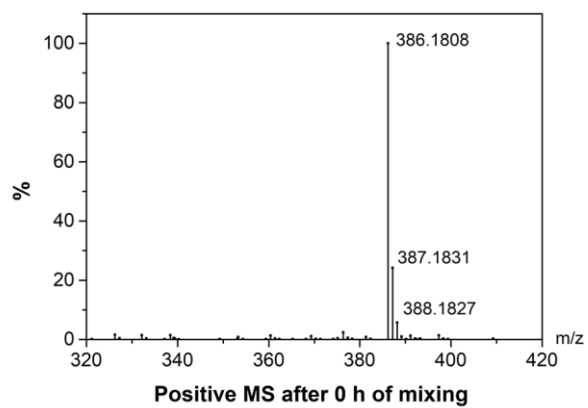

**Figure S15.** ESI-MS spectrum of ANET+Cys in positive ion mode for 0 h.

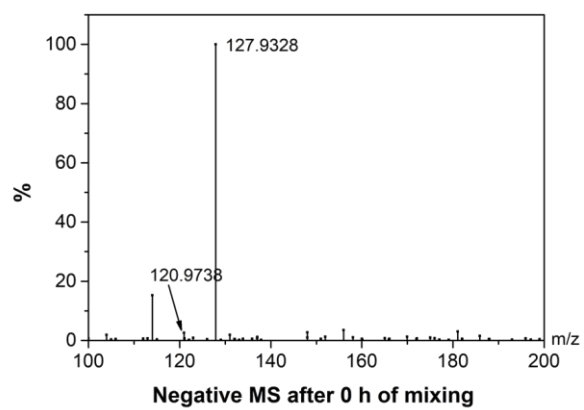

**Figure S16.** ESI-MS spectrum of ANET+Cys in negative ion mode for 0 h.

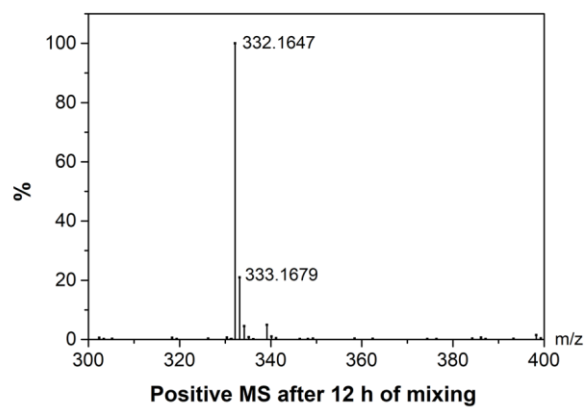

**Figure S17.** Positive ion mode ESI-MS spectrum of **ANET** reacted with 2 equiv Cys for 12 h in CH<sub>3</sub>CN/H<sub>2</sub>O (1/1 v/v).

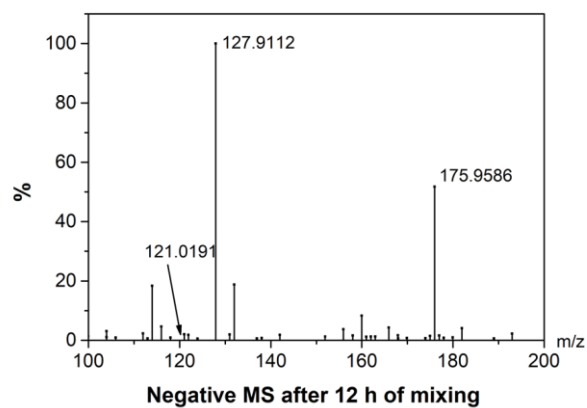

**Figure S18.** Negative ion mode ESI-MS spectrum of **ANET** reacted with 2 equiv Cys for 12 h in CH<sub>3</sub>CN/H<sub>2</sub>O (1/1 v/v).

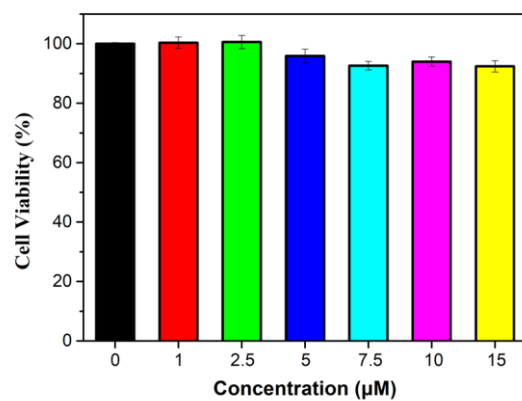

**Figure S19.** The cell cytotoxicity of various concentration of ANET in HepG2 cells for 12 h.



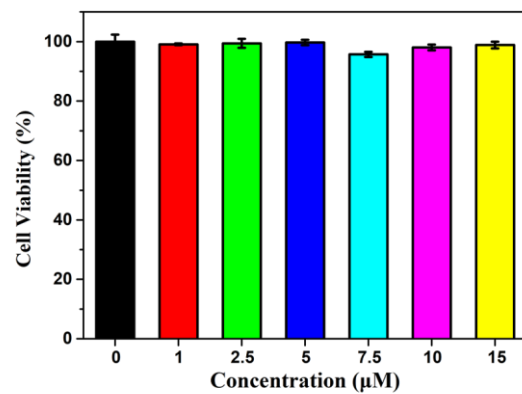

**Figure S20.** The cell cytotoxicity of various concentration of ANET in HeLa cells for 12 h.

Reference:

1. S. Li, D. Song, W. Huang, Z. Li and Z. Liu, *Analytical Chemistry*, 2020, 92, 2802-2808.
2. B. Lin, L. Fan, Y. Zhou, J. Ge, X. Wang, C. Dong, S. Shuang and M. S. Wong, *Journal of Materials Chemistry B*, 2020, 8, 10586-10592.
3. W. Niu, L. Guo, Y. Li, S. Shuang, C. Dong and M. S. Wong, *Analytical Chemistry*, 2016, 88, 1908-1914.
